# Supplementary material for: A multifunctional phosphorylcholine-based polymer reduces energy loss for efficient perovskite solar cells
Source: Royal Society of Chemistry journal article supplement (doi:10.1039/d2tc03039j), 2022-01-01
Supplement: d2tc03039j1.pdf [file d2tc03039j1.pdf]

## Electronic Supplementary Information

### **A Multifunctional Phosphorylcholine-based Polymer Reduces Energy Loss for Efficient Perovskite Solar Cells**

Lei Zhang,<sup>a</sup> Jiaxin Gao,<sup>b</sup> Zuhao You,<sup>a</sup> Qi Li,<sup>a</sup> Ming Liu,<sup>a</sup> Zaifei Ma<sup>b</sup> and Yao Liu<sup>\*a</sup>

<sup>a</sup> State Key Laboratory of Chemical Resource Engineering, Beijing Advanced Innovation Center for Soft Matter Science and Engineering, Beijing University of Chemical Technology, Beijing 100029, China

<sup>b</sup> State Key Laboratory for Modification of Chemical Fibers and Polymer Materials, Center for Advanced Low-dimension Materials, College of Materials Science and Engineering, Donghua University, Shanghai, 201620, China

\*Corresponding author.

*E-mail address:* liuyao@mail.buct.edu.cn

## Material synthesis

### Synthesis of PMPC:

The RAFT agent 4-cyano-4- (ethylthiocarbonothioylthio) pentanoic acid (ECT) was synthesized according to the literature<sup>1</sup> Polymerization of MPC was carried out under [monomer]:[CTA]:[initiator]=500:10:1. MPC (0.50 g, 1.69 mmol), ECT (9.52 mg, 0.036 mmol), ACVA (1.01 mg, 0.0036 mmol) was dissolved in 0.5 M sodium chloride solution in water and titrated by 0.1 M sodium hydroxide solution in water. The solution was added to Schlenk tubes, then degassed by freeze-evacuate-thaw cycles three times. The tubes were heated under 70 °C for 24 h and the reaction was stopped by exposure to the air and cooled by water. The resulting solution was dialysis in water and lyophilization, giving the polymer as white solid. <sup>1</sup>H NMR (400 MHz, D<sub>2</sub>O).  $\delta$  (ppm) 4.25 (m, 2H), 4.18 (m, 2H), 4.04 (m, 2H), 3.64 (s, 6H), 3.19 (m, 2H), 2.03-1.80 (m, 2H), 1.35-0.75 (m, 3H). GPC: Mn: 17.2 kDa, Mw: 21.2 kDa, PDI:1.23

### Synthesis of PDI-NOH:

3,4,9,10-perylenetetracarboxylic dianhydride (0.39 g, 1 mmol) was dispersed in *N, N*-dimethylformamide (15 mL) into a round bottom flask. The flask was evacuated and refilled with nitrogen several times. *N*-(3-Aminopropyl) diethanolamine (0.41 g, 2.5 mmol) was dissolved in *N, N*-dimethylformamide (DMF) and added slowly via syringe. The mixture was stirred at 90 °C for 15 h and then poured into methanol. The precipitate was filtered off and washed with methanol and dichloromethane. After dried under vacuum, PDI-NOH was obtained as red solid (0.61g, 90 %); <sup>1</sup>H NMR (400 MHz, DMSO-*d*<sub>6</sub>) with a small amount of TFA-*d*,  $\delta$ ): 8.10 (d, *J* = 7.7 Hz, 4H), 8.02 (d, *J* = 7.7 Hz, 4H), 4.11 (s, 4H), 3.79 (t, *J* = 4.8 Hz, 8H), 3.29-3.40 (m, 12H), 2.17 (m, 4H); <sup>13</sup>C NMR (100 MHz, DMSO-*d*<sub>6</sub> with a small amount of TFA-*d*,  $\delta$ ): 162.93, 133.33, 130.49, 127.82, 124.61, 123.98, 122.09, 55.62, 54.83, 51.58, 37.63, 22.47.

## Device Characterization and Measurement

Simulated AM 1.5G irradiation (100 mW cm<sup>-2</sup>) was produced by a xenon-lamp-based Enli Solar Simulator for current-voltage (*J-V*) measurements. A Keithley 2400 Source Meter was used for driving the *J-V* measurement. The devices were measured immediately after fabrication without any preconditioning. A voltage scan was measured from -0.2 V to 1.2 V with a scanning rate

of  $0.02 \text{ V s}^{-1}$ . The EQE spectra were obtained using a QE-R system (Enli Tech, Taiwan) ranging from 300 nm to 900 nm under air condition. The device active area is  $0.04 \text{ cm}^2$ . All of the PSCs had no encapsulation. sEQE spectra were recorded by a highly sensitive home-built setup, which included a halogen lamp (LSH-75, Newport), an optical chopper, a monochromator (CS260-RG-3-MC-A, Newport), a phase-locked amplifier (SR830, Stanford Instrument) and a current amplifier (SR570, Stanford Instrument). The overtone signals from the monochromator were blocked by using a set of long pass filters (600 nm, 900 nm, 1100 nm). The size of the light beam from the monochromator was reduced to approximately  $0.5 \text{ mm}^2$  by an optical aperture. EL spectra were measured using a source meter (Keithley 2400) to inject electric current into the solar cell device. A fluorescence spectrometer (KYMERA-3281-B2, Andor) with two sets of diffraction gratings, coupled to a Si EMCCD camera (DU970P-BVF, Andor, wavelength range of 400-1100 nm), and an InGaAs camera (DU491A-1.7, Andor, wavelength range of 900-1700 nm) was used to collect the photons emitted from the PSC devices.  $\text{EQE}_{\text{EL}}$  measurements were carried out using a home-built setup: Electric current was injected into the solar cells by using a digital source meter (Keithley 2400), and the emitted photons were collected by a Si diode. The current generated by the Si diode was recorded by a picoammeters (Keithley 6482). Capacitance-voltage (C-V) curve of the complete PSCs were carried out for Mott-Schottky analysis by using CHI 660D electrochemical workstation with a frequency range from 2 MHz to 10 Hz in the dark condition. Steady-state photoluminescence (PL) and time-resolved photoluminescence spectrum (TRPL) were recorded by FLS 980 spectrofluorometer (Edinburgh) with an excitation light of 405 nm and a pulsed excitation laser of 485 nm, respectively. The confocal laser scanning fluorescence microscopy was measured by ALR-SI03040100 (Nikon). Thin film X-ray diffraction (XRD) characterization of devices were measured using an D2 PHASER (Bruker) with  $\text{Cu K}\alpha$  ( $\lambda = 0.154 \text{ nm}$ ) radiation in an angle range of  $10\text{-}60^\circ$ . X-ray photoelectron spectroscopy (XPS) was measured by Monochromatic Al  $\text{K}\alpha$  X-ray source ( $h\nu = 1486.6 \text{ eV}$ ) of Thermo Scientific EACALAB Xi<sup>+</sup>. Fourier transform

infrared (FTIR) spectra were obtained on a NICOLET 6700 spectrometer using KBr tablet technique. UV-*vis* absorption spectra were measured with a UV-*vis* spectrometer (UV-2600, SHIMADZU). Kelvin probe measurements were conducted by KP Technology Model SKP 5050. The top and section scanning electron microscope (SEM) were obtained by Zeiss Gemini SEM 360 working at a 10 kV. Atomic force microscopy (AFM) measurements were carried out in tapping mode on Agilent AFM 5500.

### ***t*DOS measurement**

Moreover, the trap density of states (*t*DOS) was calculated using the equation:<sup>2, 3</sup>

$$N_T(E_\omega) = -\frac{V_{bi} dC \omega}{qWd\omega k_B T}$$

Where  $V_{bi}$  is the built-in potential,  $C$  is the capacitance,  $\omega$  is the angular frequency,  $q$  is the elementary charge,  $W$  is the depletion width (using the thickness of the active layer),<sup>4</sup>  $V_{bi}$  is the built-in potential (extracted from the Mott-Schottky analysis),  $k_B$  is the Boltzmann's constant and  $T$  is the temperature. The applied angular frequency  $\omega$  is defined using the equation:<sup>5</sup>

$$E_\omega = k_B T \ln \left( \frac{\omega_0}{\omega} \right)$$

where  $k_B$  is the Boltzmann's constant,  $\omega_0$  is the characteristic transition angular frequency.

### **TRPL measurement**

The PL decay curve is well fitted into a bi-exponential function:<sup>6,7</sup>

$$I_{(t)} = A_1 \cdot \exp \left( -\frac{t}{\tau_1} \right) + A_2 \cdot \exp \left( -\frac{t}{\tau_2} \right) + C$$

Where  $A_1$ ,  $A_2$  and  $C$  are constant,  $t$  is PL decay time, a fast decay ( $\tau_1$ ) and a slow decay ( $\tau_2$ ) are fitted lifetimes.

The average PL decay time  $\tau_{average}$  is calculated by following equation:

$$\tau_{average} = \frac{A_1 \tau_1^2 + A_2 \tau_2^2}{A_1 \tau_1 + A_2 \tau_2}$$

## SCLC measurement

SCLC measurement was applied to determine the hole trap density using the hole-only device with a configuration of ITO/PTAA@PMPC/perovskite (or perovskite: PMPC)/MoO<sub>3</sub>/Au.  $N_d$  in the perovskites can be calculated according to the equation:<sup>8</sup>

$$N_d = \frac{2\varepsilon\varepsilon_0V_{TFL}}{eL^2}$$

Where  $\varepsilon = 32$ ,<sup>9</sup>  $\varepsilon_0 = 8.85 \times 10^{-14}$  F cm<sup>-1</sup>, and  $e = 1.6 \times 10^{-19}$  C are relative dielectric constant, vacuum permittivity, and elementary charge, respectively; L is the perovskite film thickness.

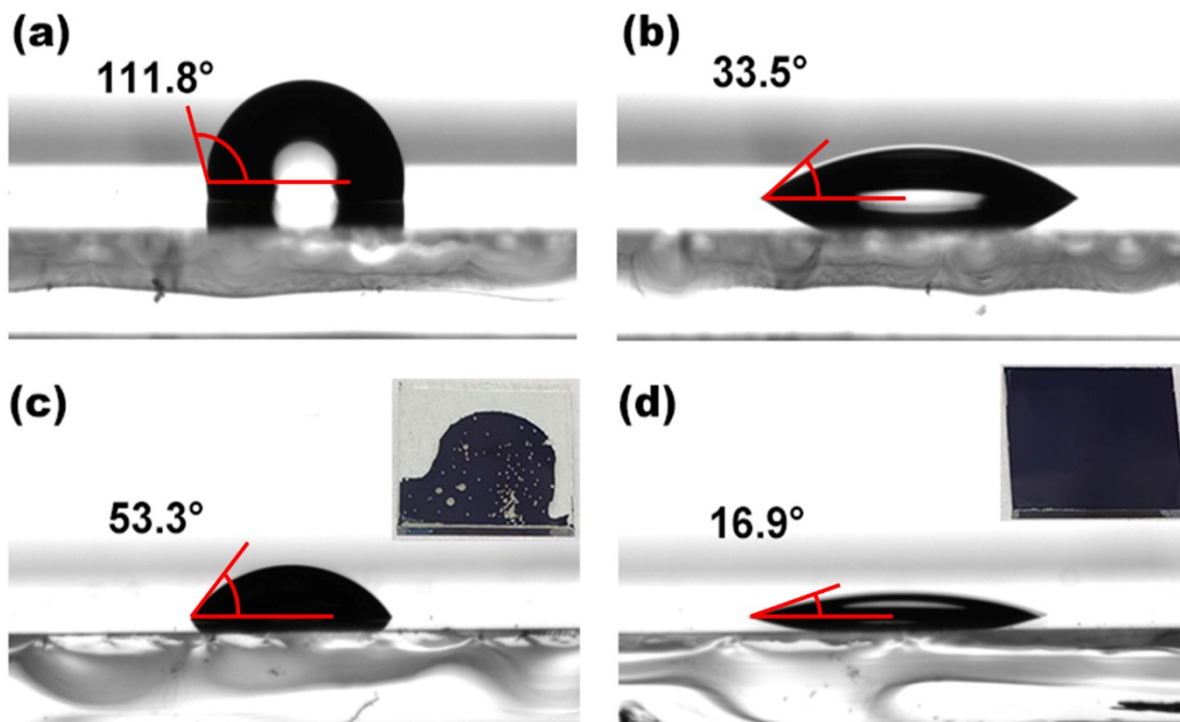

**Figure S1.** Contact angles of water on (a) PTAA and (b) PMPC@PTAA, contact angles of mix solvent (DMF/DMSO) on (c) PTAA and (d) PMPC@PTAA. The corresponding optical photos of perovskite films fabricated on different substrates are shown in inset.

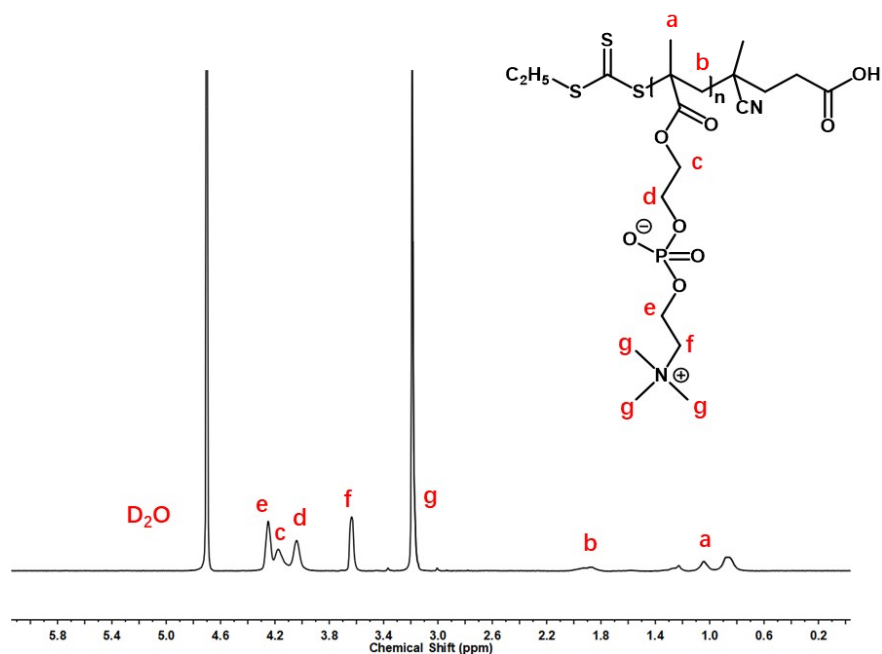

**Figure S2.** <sup>1</sup>H NMR spectrum of PMPC.

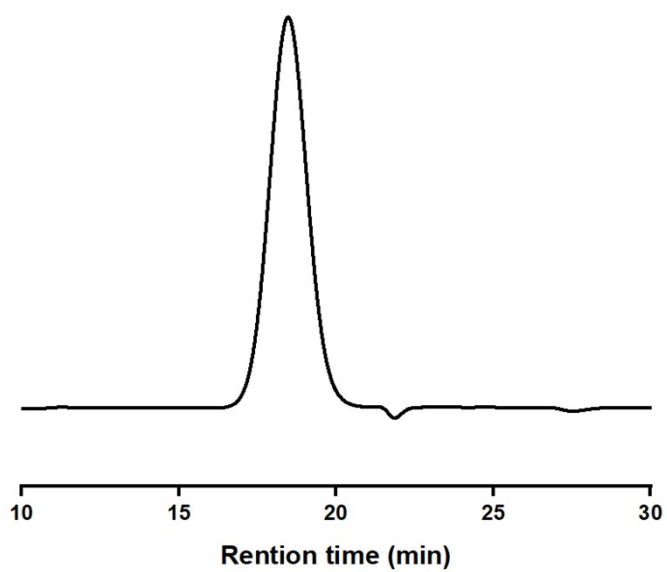

**Figure S3.** GPC spectrum of PMPC.

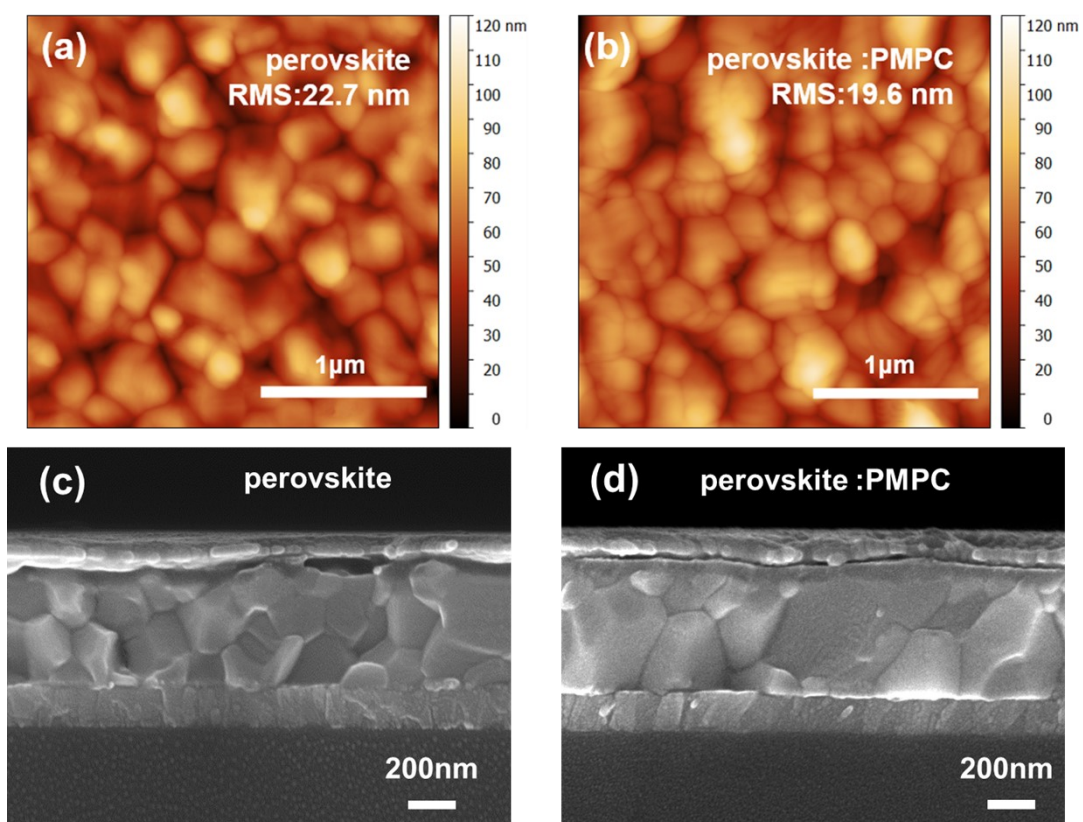

**Figure S4.** The atomic force microscope (AFM) images of (a) pristine perovskite and (b) perovskite: PMPC-based films, and cross-sectional SEM image of (c) pristine perovskite and (d) perovskite: PMPC-based films.

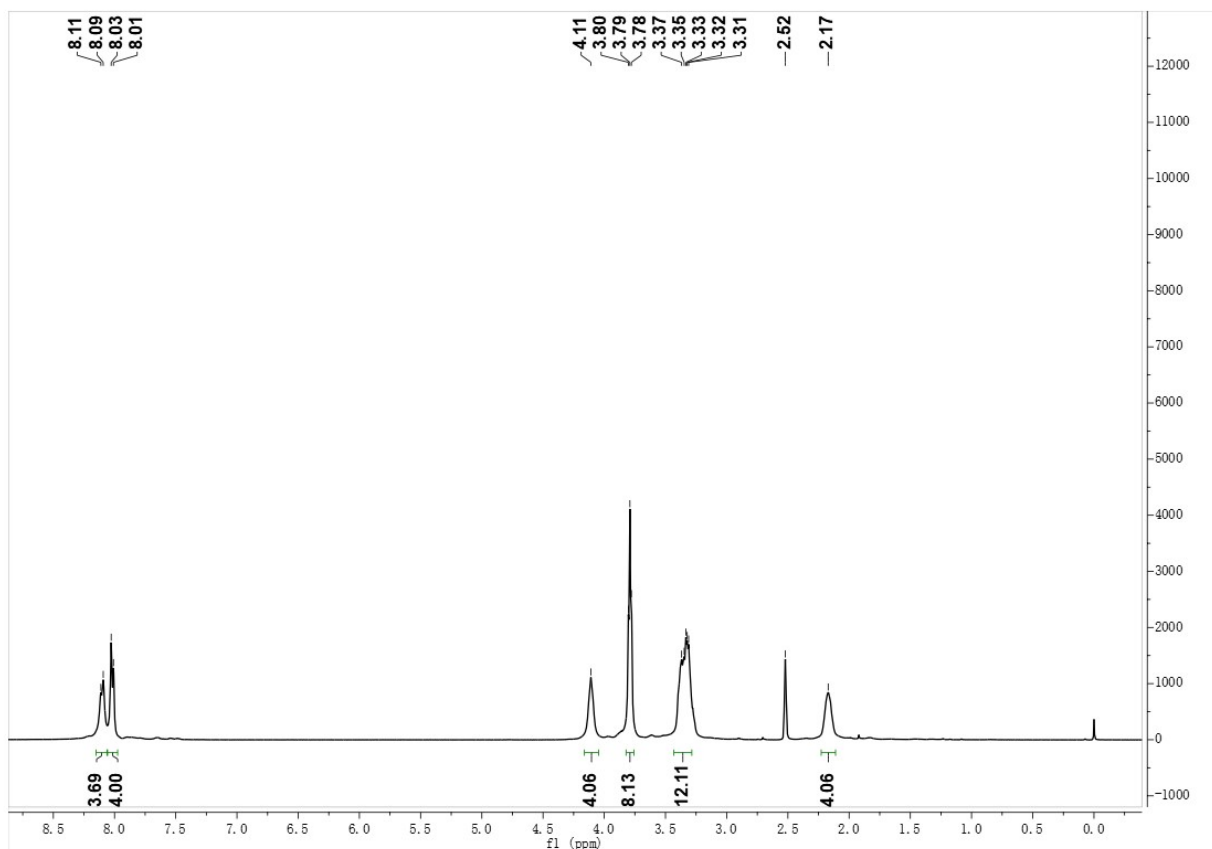

Figure S5.  $^1\text{H}$  NMR spectrum of PDI-NOH.



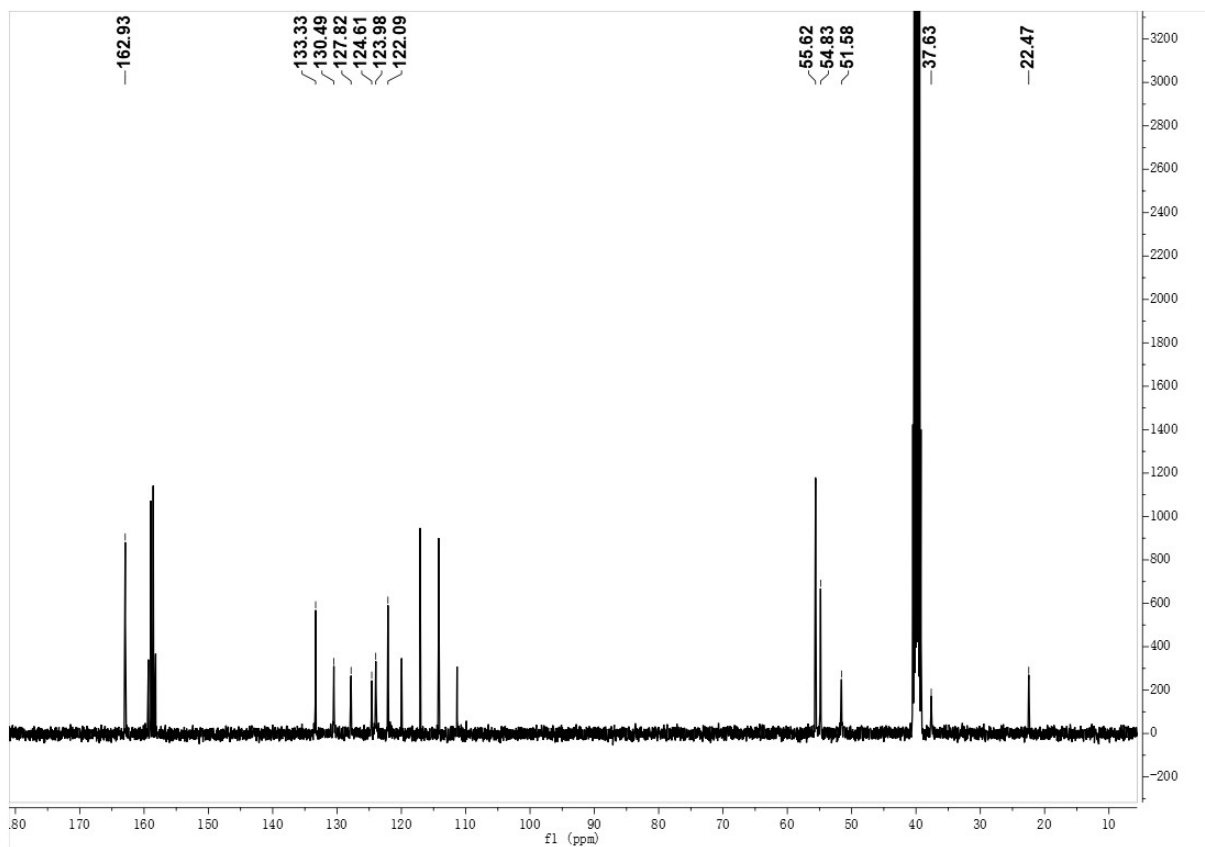

**Figure S6.**  $^{13}\text{C}$  NMR spectrum of PDI-NOH.

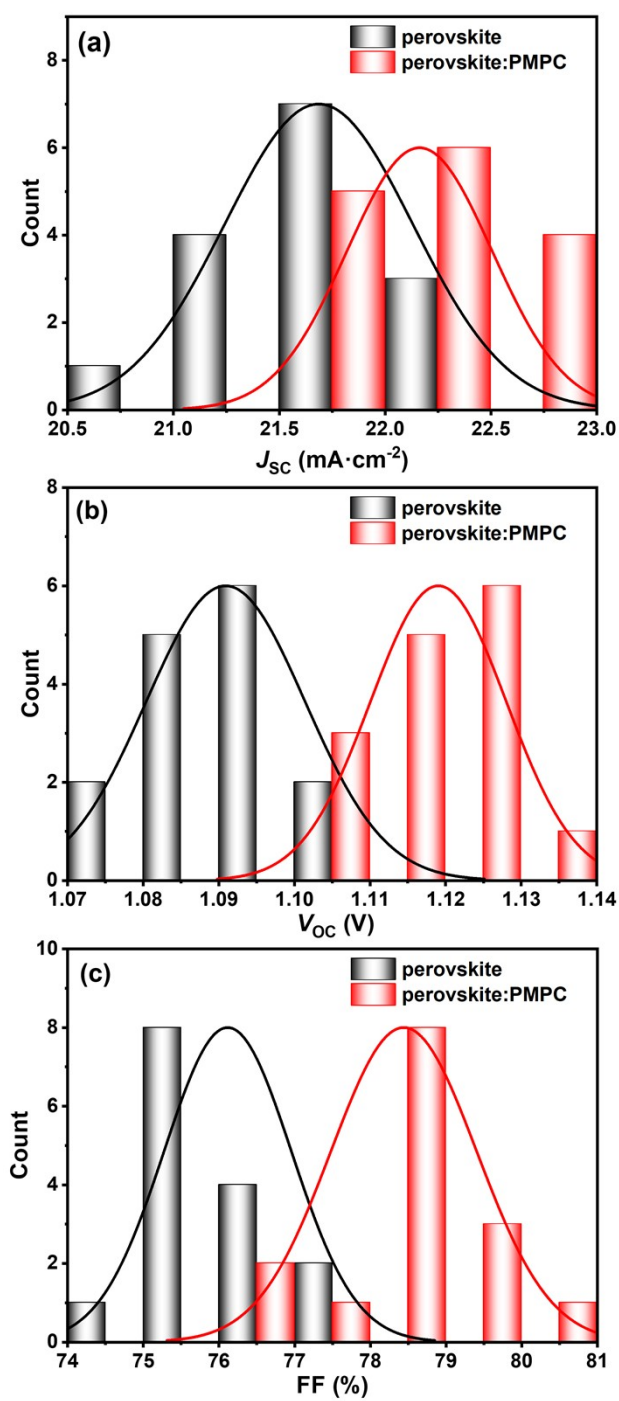

**Figure S7.** Photovoltaic parameter statistics of (a)  $J_{sc}$ , (b)  $V_{oc}$ , and (c) FF of pristine perovskite and perovskite: PMPC-based PSCs. 15 individual devices were used for statistical analysis.

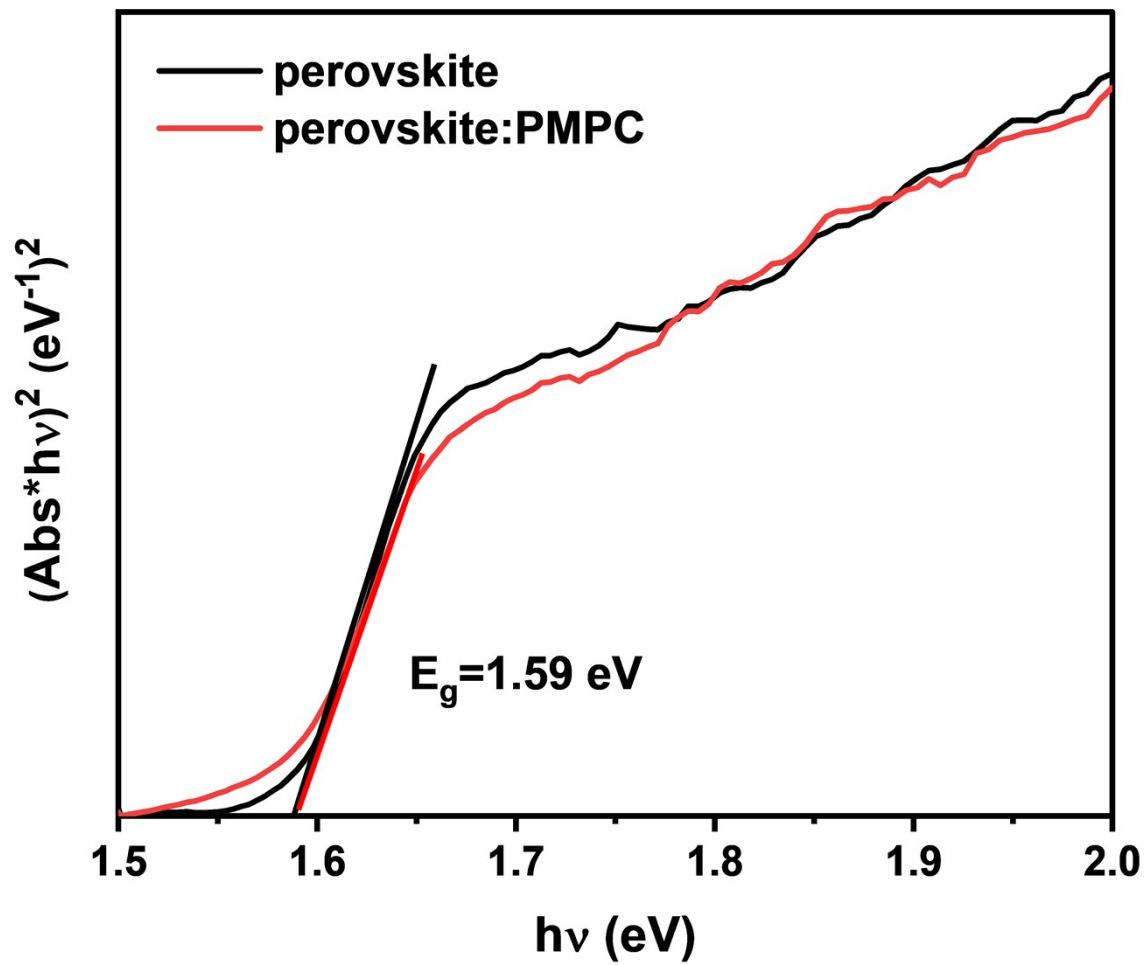

**Figure S8.** Tauc plots of the perovskite films with and without PMPC passivation from the UV-*vis* absorption spectra.

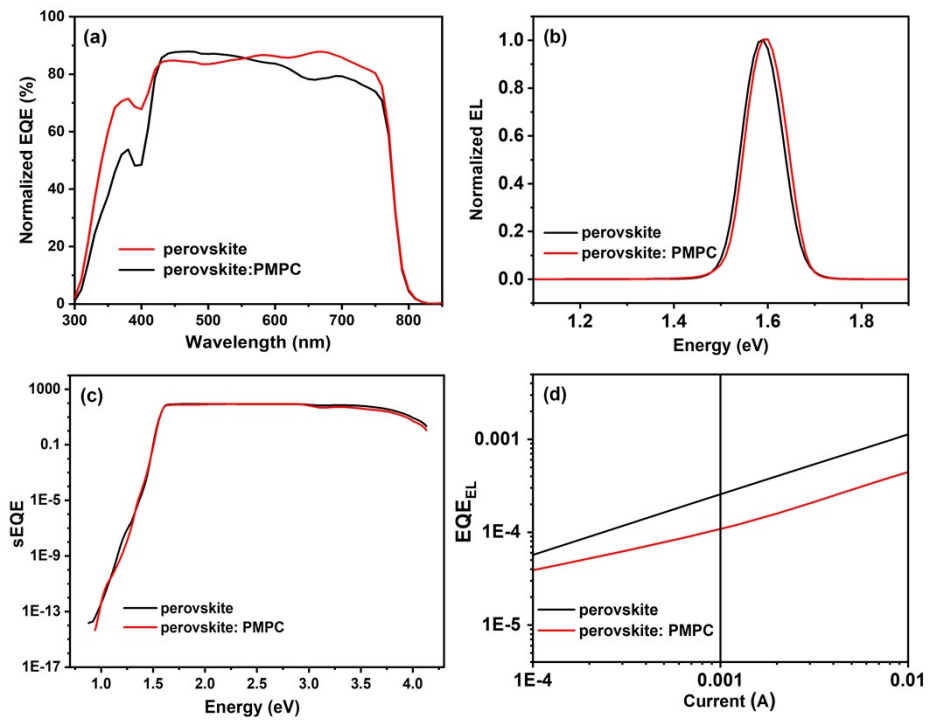

**Figure S9.** (a) EQE spectrum, (b) Normalized electroluminescence spectrum (EL), (c) EQE<sub>PV</sub> (sEQE), and (d) EQE<sub>EL</sub> for pristine perovskite and perovskite: PMPC-based PSCs, which used for calculating the values in Table 2.

**Table S1.** Summary of  $V_{OC}$  loss of MAPbI<sub>3</sub> based PSCs containing different polymer or small molecule passivators.

| passivators        | passivated device structure                                                                       | PCE (%) | $V_{OC}$ loss (V) | Ref./Year          |
|--------------------|---------------------------------------------------------------------------------------------------|---------|-------------------|--------------------|
| PMPC               | ITO/PTAA@PMPC/MAPbI <sub>3</sub> : PMPC/<br>PC <sub>61</sub> BM/PDI-NOH/Ag                        | 20.2    | 0.48              | This work          |
| PS                 | ITO/PTAA/MAPbI <sub>3</sub> : PS/PC <sub>61</sub> BM/BCP/Ag                                       | 18.8    | 0.51              | 2020 <sup>10</sup> |
| PCE-10             | ITO/PTAA/MAPbI <sub>3</sub> : PCE-<br>10/PC <sub>61</sub> BM/BCP/Ag                               | 19.4    | 0.53              | 2020 <sup>10</sup> |
| PASP               | ITO/P <sub>3</sub> CT-<br>Na/PASP/MAPbI <sub>3</sub> /PC <sub>61</sub> BM/C <sub>60</sub> /BCP/Ag | 20.0    | 0.52              | 2019 <sup>11</sup> |
| PCBB-OEG           | ITO/PTAA/MAPbI <sub>3</sub> /PCBB-OEG/<br>PC <sub>61</sub> BM/Al                                  | 20.2    | 0.52              | 2018 <sup>12</sup> |
| PVC                | ITO/PTAA/MAPbI <sub>3</sub> : PVC/PC <sub>61</sub> BM/Al                                          | 18.7    | 0.52              | 2020 <sup>13</sup> |
| PMMA               | ITO/PTAA/PMMA/MAPbI <sub>3</sub> /PC <sub>61</sub> BM/ZrAcac<br>/Ag                               | 19.5    | 0.49              | 2020 <sup>14</sup> |
| PVPy               | FTO/TiO <sub>2</sub> /MAPbI <sub>3</sub> /PVP/Spiro-OMeTAD/Au                                     | 15.1    | 0.54              | 2017 <sup>15</sup> |
| PEG                | FTO/TiO <sub>2</sub> /MAPbI <sub>3</sub> : PEG/Spiro-OMeTAD/Au                                    | ~16     | 0.57              | 2016 <sup>16</sup> |
| TOPO               | FTO/TiO <sub>2</sub> /ZrO <sub>2</sub> /Carbon (TOPO/MAPbI <sub>3</sub> )                         | 12.8    | 0.63              | 2018 <sup>17</sup> |
| F-PDI              | ITO/NiO <sub>x</sub> /MAPbI <sub>3</sub> : F-PDI/<br>PC <sub>61</sub> BM/BCP/Ag                   | 18.3    | 0.56              | 2019 <sup>18</sup> |
| Rough FTO          | FTO/SnO <sub>2</sub> /CH <sub>3</sub> NH <sub>3</sub> PbI <sub>3</sub> /Spiro-OMeTAD/Au           | 20.4    | 0.37              | 2018 <sup>19</sup> |
| OA                 | FTO/bl-TiO <sub>2</sub> /mp-TiO <sub>2</sub> /MAPbI <sub>3</sub> :<br>OA/PTAA/Au                  | 20.6    | 0.49              | 2018 <sup>20</sup> |
| GuaBF <sub>4</sub> | ITO/NiO <sub>x</sub> /MAPbI <sub>3</sub> /GuaBF <sub>4</sub> /PC <sub>61</sub> BM/BCP/A<br>g      | 20.54   | 0.49              | 2022 <sup>21</sup> |
| Arginine           | ITO/PTAA/MAPbI <sub>3</sub> : Arg/<br>PC <sub>61</sub> BM/BCP/Ag                                  | 20.49   | 0.43              | 2021 <sup>22</sup> |
| HTAB               | ITO/PTAA/HTAB/MAPbI <sub>3</sub> /PC <sub>61</sub> BM/BCP/Ag                                      | 21.01   | 0.48              | 2022 <sup>23</sup> |
| MAOCN              | ITO/TAPC/<br>MAPbI <sub>3</sub> :<br>MAOCN/PCBM/BCP/Ag                                            | 21.28   | 0.47              | 2021 <sup>24</sup> |

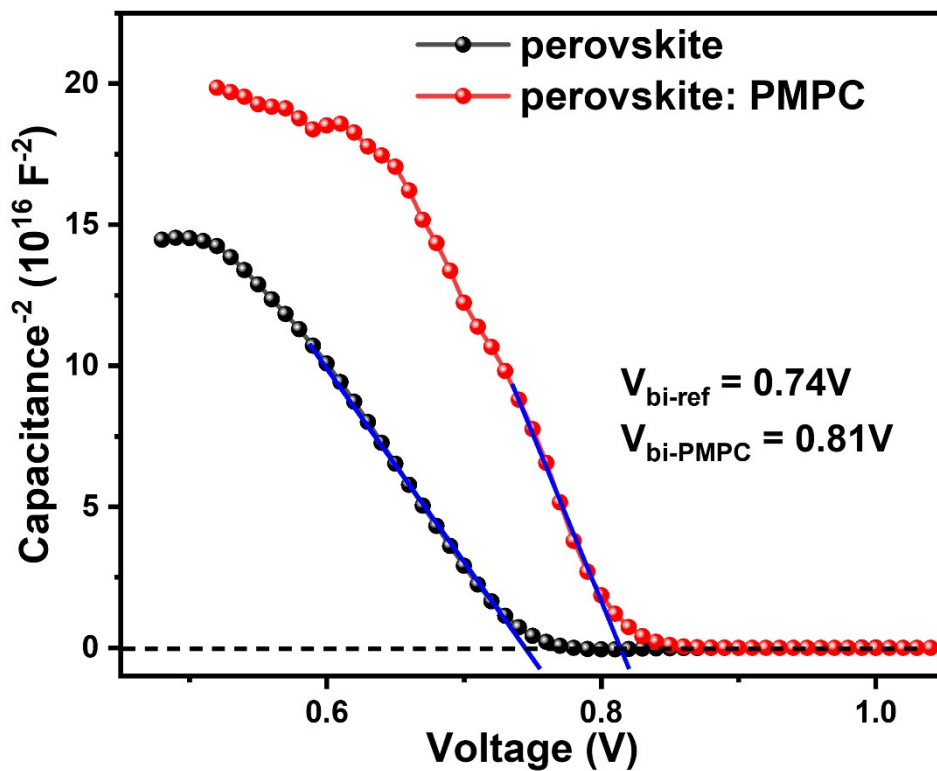

Figure S10. Mott-Schottky plots of devices with and without PMPC passivation measured at 1 kHz probe frequency.

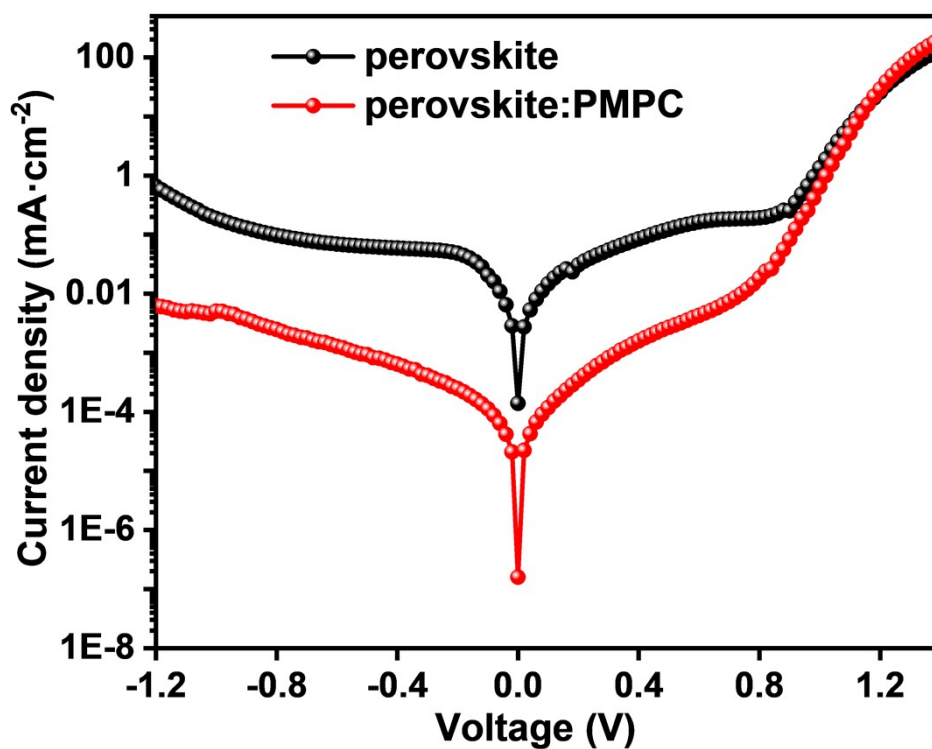

Figure S11. Dark  $J-V$  curves of the PSCs with and without PMPC passivation.

**Table S2.** Fitted parameters of the TRPL curve of perovskite and perovskite: PMPC films.

| Cells               | $A_1$ | $\tau_1$ (ns) | $A_2$ | $\tau_2$ (ns) | $\tau_{\text{average}}$ (ns) |
|---------------------|-------|---------------|-------|---------------|------------------------------|
| Perovskite          | 0.78  | 3.29          | 0.34  | 68.55         | 61.98                        |
| Perovskite:<br>PMPC | 0.70  | 3.55          | 0.37  | 102.56        | 96.45                        |

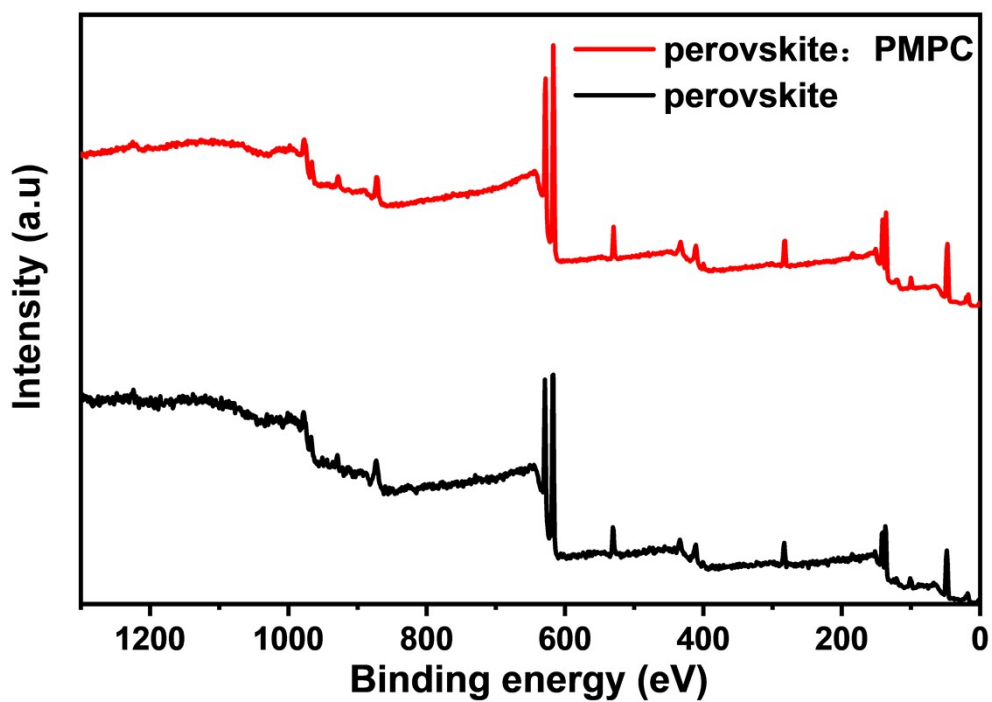

**Figure S12.** XPS survey spectra of pristine perovskite and perovskite: PMPC films.



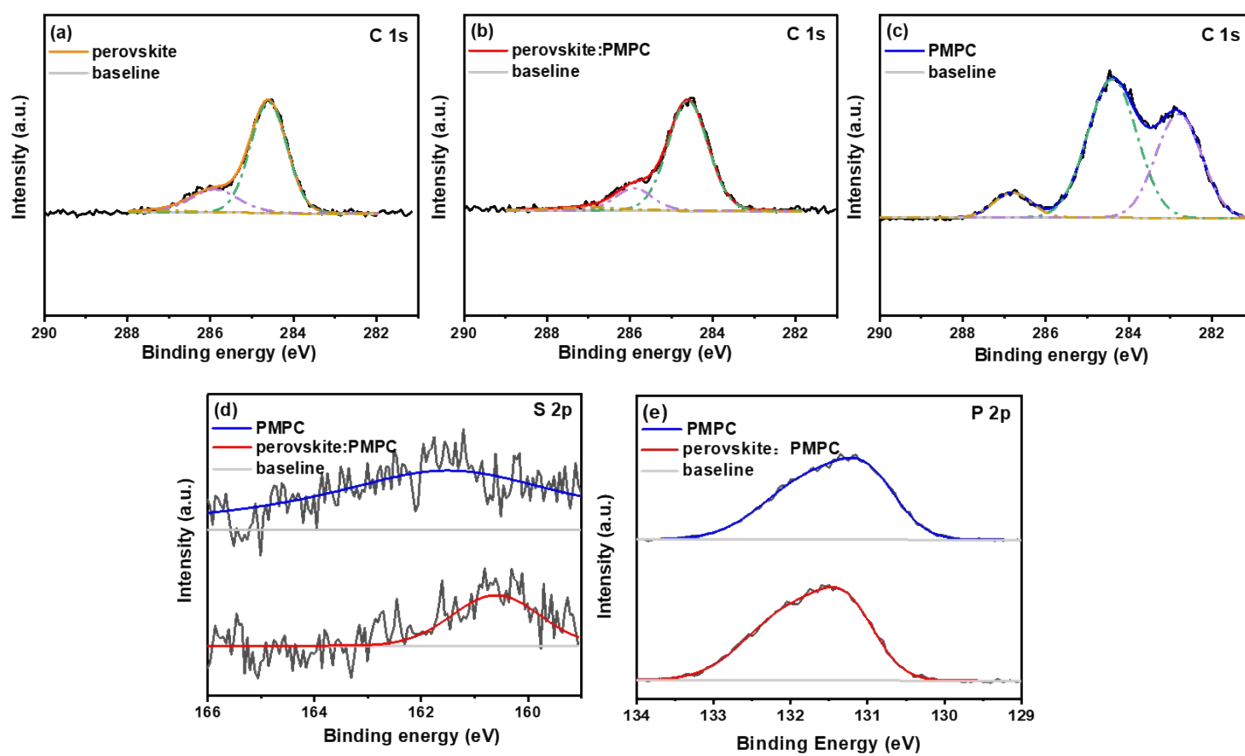

**Figure S13.** High-resolution XPS spectra of C1s for (a) perovskite, (b) perovskite: PMPC, (c) PMPC films; (d) S 2p and (e) P 2p for the PMPC and perovskite: PMPC films.

## Reference

- 1 T. Jin, M. Liu, K. Su, Y. Lu, G. Cheng, Y. Liu, N. W. Li and L. Yu, *ACS Appl. Mater. Interfaces*, 2021, **13**, 57489-57496.
- 2 M. Zi, X. Chen, S. Tan, C. Weng and B. Zhao, *Chem. Eng. J.*, 2022, **443**, 136455.
- 3 T. Walter, R. Herberholz, C. Müller and H. W. Schock, *J. Appl. Phys.*, 1996, **80**, 4411-4420.
- 4 Z. Li, Q. Shi, X. Ma, Y. Li, K. Wen, L. Qin, H. Chen, W. Huang, F. Zhang, Y. Lin, T. J. Marks and H. Huang, *Nat. Commun.*, 2022, **13**, 144-152.
- 5 J. A. Carr and S. Chaudhary, *J. Appl. Phys.*, 2013, **114**, 064509.
- 6 Q. Zhou, J. Qiu, Y. Wang, M. Yu, J. Liu and X. Zhang, *ACS Energy Lett.*, 2021, **6**, 1596-1606.
- 7 M. Jeong, I. W. Choi, E. M. Go, Y. Cho, M. Kim, B. Lee, S. Jeong, Y. Jo, H. W. Choi, J. Lee, J.-H. Bae, S. K. Kwak, D. S. Kim and C. Yang, *Science*, 2020, **369**, 1615-1620.
- 8 J. Chen, L. Zuo, Y. Zhang, X. Lian, W. Fu, J. Yan, J. Li, G. Wu, C.-Z. Li and H. Chen, *Adv. Energy Mater.*, 2018, **8**, 1800438.
- 9 Q. Dong, Y. Fang, Y. Shao, P. Mulligan, J. Qiu, L. Cao and J. Huang, *Science*, 2015, **347**, 967-970.
- 10 Y. Ma, Y. Cheng, X. Xu, M. Li, C. Zhang, S. H. Cheung, Z. Zeng, D. Shen, Y. M. Xie, K. L. Chiu, F. Lin, S. K. So, C. S. Lee and S. W. Tsang, *Adv. Funct. Mater.*, 2020, **31**, 2006802.
- 11 B. Wang, F. Wu, S. Bi, J. Zhou, J. Wang, X. Leng, D. Zhang, R. Meng, B. Xue, C. Zong, L. Zhu, Y. Zhang and H. Zhou, *J. Mater. Chem. A*, 2019, **7**, 23895-23903.
- 12 G. Xu, R. Xue, W. Chen, J. Zhang, M. Zhang, H. Chen, C. Cui, H. Li, Y. Li and Y. Li, *Adv. Energy Mater.*, 2018, **8**, 1703054.
- 13 L. A. Frolova, A. I. Davlethanov, N. N. Dremova, I. Zhidkov, A. F. Akbulatov, E. Z.

- Kurmaev, S. M. Aldoshin, K. J. Stevenson and P. A. Troshin, *J Phys Chem Lett*, 2020, **11**, 6772-6778.
- 14 J. Wang, J. Xu, Z. Li, X. Lin, C. Yu, H. Wu and H.-l. Wang, *ACS Appl. Energy Mater.*, 2020, **3**, 6344-6351.
- 15 B. Chaudhary, A. Kulkarni, A. K. Jena, M. Ikegami, Y. Udagawa, H. Kunugita, K. Ema and T. Miyasaka, *ChemSusChem*, 2017, **10**, 2473-2479.
- 16 Y. Zhao, J. Wei, H. Li, Y. Yan, W. Zhou, D. Yu and Q. Zhao, *Nat. Commun.*, 2016, **7**, 10228.
- 17 G. Huang, C. Wang, H. Zhang, S. Xu, Q. Xu and Y. Cui, *J. Mater. Chem. A*, 2018, **6**, 2449-2455.
- 18 J. Yang, C. Liu, C. Cai, X. Hu, Z. Huang, X. Duan, X. Meng, Z. Yuan, L. Tan and Y. Chen, *Adv. Energy Mater.*, 2019, **9**, 1900198.
- 19 Y. Wang, Y. Liang, Y. Zhang, W. Yang, L. Sun and D. Xu, *Adv. Funct. Mater.*, 2018, **28**, 1801237.
- 20 M. Jung, T. J. Shin, J. Seo, G. Kim and S. I. Seok, *Energy Environ. Sci.*, 2018, **11**, 2188-2197.
- 21 B. Huang, X. Xia, X. Wang and F. Li, *Sol. Energy Mater Sol. Cells*, 2022, **240**, 111682.
- 22 J. Hu, X. Xu, Y. Chen, S. Wu, Z. Wang, Y. Wang, X. Jiang, B. Cai, T. Shi, C. J. Brabec, Y. Mai and F. Guo, *J. Mater. Chem. A*, 2021, **9**, 5857-5865.
- 23 Q. Sun, B. Zong, X. Meng, B. Shen, X. Li, B. Kang and S. R. P. Silva, *ACS Appl. Mater*, 2022, **14**, 6702-6713.
- 24 J. Tao, Z. Wang, H. Wang, J. Shen, X. Liu, J. Xue, H. Guo, G. Fu, W. Kong and S. Yang, *ACS Appl. Mater*, 2021, **13**, 44451-44459.
